# Supplementary material for: Uracil grafted imine-based covalent organic framework for nucleobase recognition
Source: Royal Society of Chemistry journal article supplement (doi:10.1039/c8cc04346a), 2018-01-01
Supplement: c8cc04346a1.pdf [file c8cc04346a1.pdf]

## Electronic Supporting Information

### Uracil grafted imine-based covalent organic framework for nucleobase recognition

Sergio Royuela,<sup>a,b</sup> Eduardo Garcia-Garrido,<sup>c</sup> Miguel Martín-Arroyo,<sup>d</sup> María J. Mancheño,<sup>a</sup> María M. Ramos,<sup>b</sup> David Gonzalez,<sup>d,f</sup> Alvaro Somoza,<sup>\*c</sup> Félix Zamora<sup>\*c,e,f,g</sup> and José L. Segura<sup>\*a</sup>

<sup>a</sup> Departamento de Química Orgánica I, Facultad de CC. Químicas, Universidad Complutense de Madrid, Madrid 28040, Spain

<sup>b</sup> Departamento de Tecnología Química y Ambiental, Universidad Rey Juan Carlos, Madrid 28933, Spain

<sup>c</sup> Instituto Madrileño de Estudios Avanzados en Nanociencia (IMDEA-Nanociencia), Cantoblanco, Madrid E-28049, Spain.

<sup>d</sup> Departamento de Orgánica, Facultad de Ciencias, Universidad Autónoma de Madrid, Madrid 28049, Spain.

<sup>e</sup> Departamento de Inorgánica, Facultad de Ciencias, Universidad Autónoma de Madrid, Madrid 28049, Spain.

<sup>f</sup> Institute for Advanced Research in Chemical Sciences (IAdChem). Universidad Autónoma de Madrid. 28049 Madrid, Spain.

<sup>g</sup> Condensed Matter Physics Center (IFIMAC). Universidad Autónoma de Madrid. 28049 Madrid, Spain.

**General methods.** All reactions with air-sensitive materials were carried out under Ar using standard Schlenk techniques. TLC was performed using pre-coated silica gel 60 F254 and developed in the indicated solvent system. Compounds were visualized under UV light ( $\lambda = 254$  nm). Merck 60 (230–400 Mesh) silica gel was used for column chromatography.

$^1\text{H}$  NMR and  $^{13}\text{C}$  NMR spectra were recorded on a 300 MHz spectrometer. Chemical shifts are reported in ppm and referenced to the residual non-deuterated solvent frequencies ( $\text{CDCl}_3$ :  $\delta$  7.26 ppm for  $^1\text{H}$ , 77.0 ppm for  $^{13}\text{C}$ ). CP/MAS- $^{13}\text{C}$  NMR were recorded on a 400 MHz spectrometer Wide Bore (probe: 4 mm MAS WB DVT). The sample rotation frequency was 12 kHz and a 2.5 mm  $\text{ZrO}_2$  rotor was used. Mass spectra were recorded by means of MALDI-TOF or FAB/IE techniques. Solids were analysed on a diamond plate (ATR) or as films on sodium chloride.

### **Powder X-ray diffraction**

Powder X-ray diffraction measurements were carried out with X'PERT MPD with conventional Bragg-Brentano geometry using  $\text{K}\alpha$  ( $\lambda = 1.5406$  Å) for values of  $2\theta$  from  $2^\circ$  to  $40^\circ$ .

### **Thermogravimetric analysis**

Thermogravimetric analysis was performed on a TGA-Q-50 instrument on a platinum plate, heating the samples under nitrogen atmosphere at a heating rate of  $10^\circ\text{C}/\text{min}$ . Prior to the measurements the samples were activated at  $120^\circ\text{C}$  under vacuum.

### **UV-visible spectroscopy**

UV-visible spectra data were recorded in a Synergy H4 Hybrid reader using 96 well plates.

### **Materials**

The following reagents were commercially available and were used as received: 2,5-dimethoxyterephthaldehyde (**DMTA**), CuI, *o*-DCB, *n*-butanol,  $\text{NaN}_3$  and DIPEA.

2,5-dihydroxyterephthaldehyde (**DHTA**),<sup>1</sup> 2,5-bis(prop-2-in-1-yloxy)terephthaldehyde (**BPTA**),<sup>1</sup> 1,3,5-tris-(4-aminophenyl)benzene (**TAPB**),<sup>2</sup>  $[\text{HC}\equiv\text{C}]_{0.5}\text{-TPB-DMTP-COF}$ ,<sup>1</sup> were prepared according to reported procedures.

Adenine, cytosine, uracil and thymine were obtained from Sigma-Aldrich. All the compounds were used without further purification.

### Nucleobase interaction studies

Stock solutions of each nucleobase (3.7 mM) in water were prepared. Each COF (0.5 mg) was vortexed for 1 min with a solution of each nucleobase at three different concentrations (50, 100 and 150  $\mu$ M). The final volume of each sample was 600  $\mu$ L. Control experiments using the nucleobases were done at the same concentrations. The samples were incubated at room temperature for the time indicated in the figures and centrifuged at 4 °C for 45 min at 13000 rpm (around 15700 g). The supernatants were collected, the absorbance recorded and the amount of free nucleobases quantified applying Beer-Lambert law. All the experiments were done in triplicates. Statistical analysis was performed using one-way ANOVA Tukey's test (each group vs Control). \* $P < 0.01$ , \*\* $P < 0.001$ , and \*\*\* $P < 0.0001$ .

### Synthesis of the azide-substituted Uracil

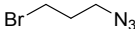 **1-azido-3-bromopropane** was synthesized following a described procedure<sup>3b</sup> using 1,3-dibromopropane (10.7 mL, 105.4 mmol), NaN<sub>3</sub> (7.5 g, 115.4 mmol) and DMF (150 mL). The crude was purified by column chromatography using cyclohexane/AcOEt (10:1) as eluent. 5.0 g of **1-azido-3-bromopropane** was obtained as a colourless oil (29% yield).

**<sup>1</sup>H-NMR** (300 MHz, CDCl<sub>3</sub>)  $\delta$  (ppm) = 3.49 (t,  $J$  = 6.4 Hz, 2H, BrCH<sub>2</sub>CH<sub>2</sub>CH<sub>2</sub>N<sub>3</sub>), 3.48 (t,  $J$  = 6.3 Hz, 2H, BrCH<sub>2</sub>CH<sub>2</sub>CH<sub>2</sub>N<sub>3</sub>), 2.08 (p, 6.4 Hz, 2H, N<sup>1</sup>CH<sub>2</sub>CH<sub>2</sub>CH<sub>2</sub>N<sub>3</sub>).

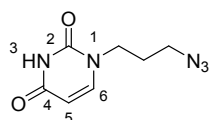

**1-(3-azidoprop-1-yl)-Uracil.** Cs<sub>2</sub>CO<sub>3</sub> (9.67 g, 70.0 mmol) was added over a suspension of **Uracil** (10 g, 89.2 mmol) in dry DMF (225 mL).

The mixture was heated to 40°C. After 30 min, **1-azido-3-bromopropane** (4.2 g, 25.6 mmol) was added and the mixture was heated to 40°C. After 24 h, the solvent was removed over low pressure and H<sub>2</sub>O (200 mL) was added. After sonication, the mixture was extracted with a CHCl<sub>3</sub>/MeOH mixture (10:1, 3x200 mL). The combined organic phases were dried with MgSO<sub>4</sub> and filtered, and the solvent

was eliminated under low pressure. The crude was purified by column chromatography using CHCl<sub>3</sub>/THF (3:1) as eluent. 1.45 g of **UR3N3** was obtained as a white solid (29% yield).

**<sup>1</sup>H-NMR** (300 MHz, CDCl<sub>3</sub>)  $\delta$  (ppm) = 9.12 (s, 1H, N<sup>3</sup>H), 7.17 (d,  $J$  = 7.9 Hz, 1H,  $H^6$ ), 5.72 (d,  $J$  = 7.9 Hz, 1H,  $H^5$ ), 3.83 (t,  $J$  = 6.8 Hz, 2H, N<sup>1</sup>CH<sub>2</sub>CH<sub>2</sub>CH<sub>2</sub>N<sub>3</sub>), 3.41 (t,  $J$  = 6.3 Hz, 2H, N<sup>1</sup>CH<sub>2</sub>CH<sub>2</sub>CH<sub>2</sub>N<sub>3</sub>), 1.97 (p, 6.7 Hz, 2H, N<sup>1</sup>CH<sub>2</sub>CH<sub>2</sub>CH<sub>2</sub>N<sub>3</sub>).

**<sup>13</sup>C-NMR** (75 MHz, CDCl<sub>3</sub>)  $\delta$  (ppm) = 163.5, 150.8, 144.5, 102.4, 48.2, 46.5, 28.0.

**HRMS** (FAB): calculated for C<sub>7</sub>H<sub>10</sub>N<sub>5</sub>O<sub>2</sub> [M+H]<sup>+</sup>: 196.0834. Found: 196.0833 [M+H]<sup>+</sup>.

## Synthesis of COFs and characterization

- Synthesis of [HC≡C]<sub>0.5</sub>-TPB-DMTP-COF:<sup>1</sup>

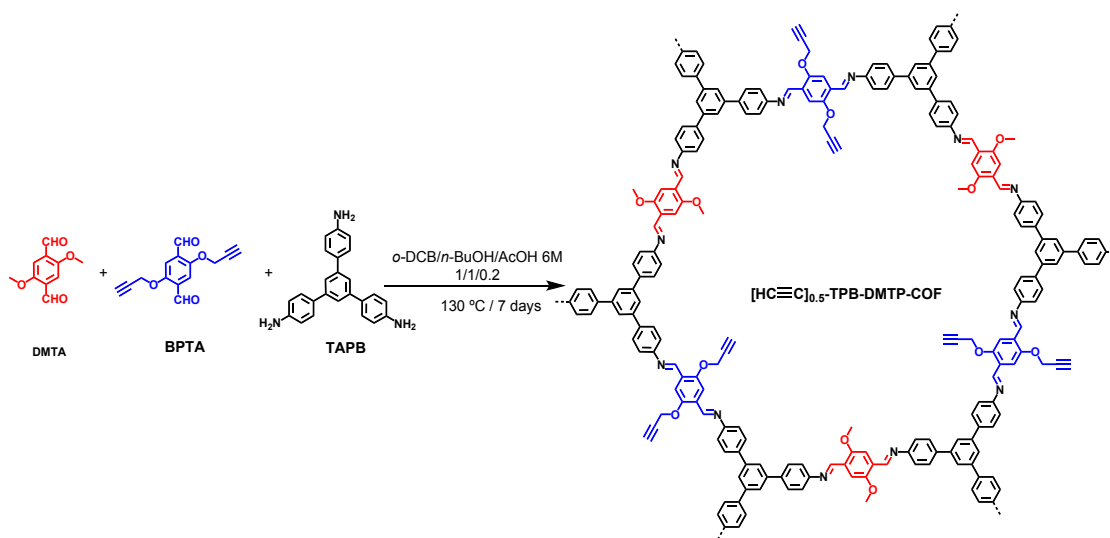

**Scheme S1.** Synthesis of [HC≡C]<sub>0.5</sub>-TPB-DMTP-COF.

Following the procedure previously described, from **DMTA** (215.3 mg, 1.109 mmol), **BPTA** (268.8 mg, 1.110 mmol), **TAPB** (520.4 mg, 1.481 mmol) and *o*-DCB/*n*-Butanol (10 mL/10 mL) and acetic acid (6 M, 2.1 mL) in a Pyrex vessel ( $\phi$  = 29 mm,  $h$  = 10 cm) were obtained, after Soxhlet extraction in THF, 866.0 mg (94 %) of a yellow solid. FTIR (ATR) (cm<sup>-1</sup>): 3288, 2957, 2127, 1689, 1592, 1504, 1415, 1291, 1208, 1146, 1036, 878, 829, 694.

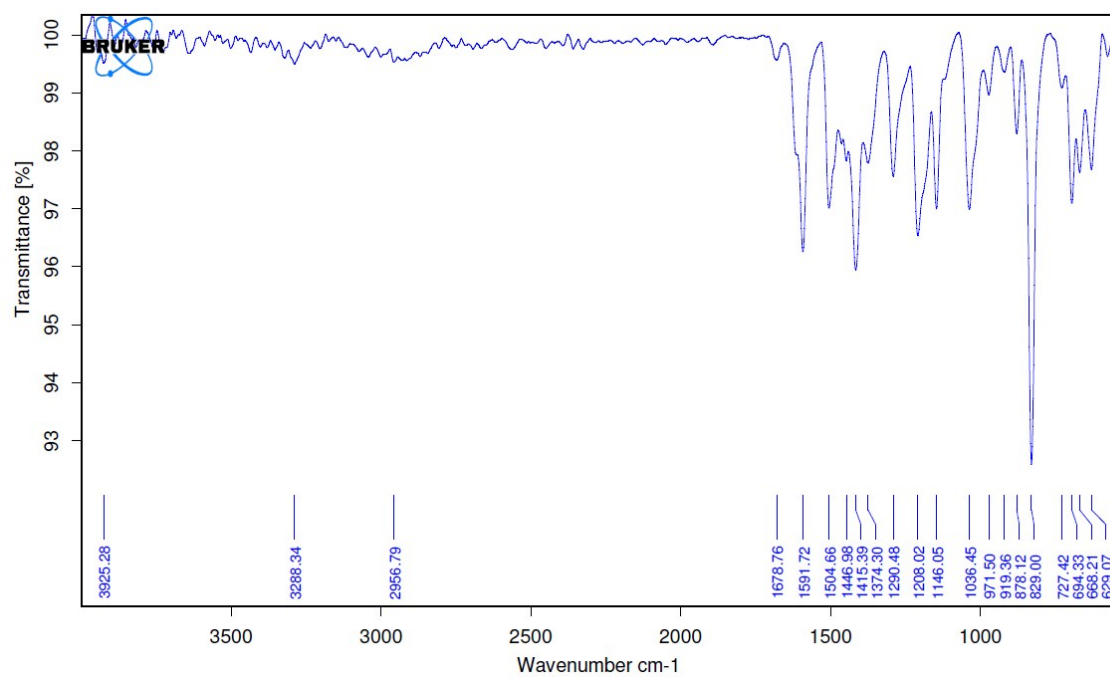

**Figure S1.** FTIR (ATR) spectrum of  $[\text{HC}\equiv\text{C}]_{0.5}\text{-TPB-DMTP-COF}$ .

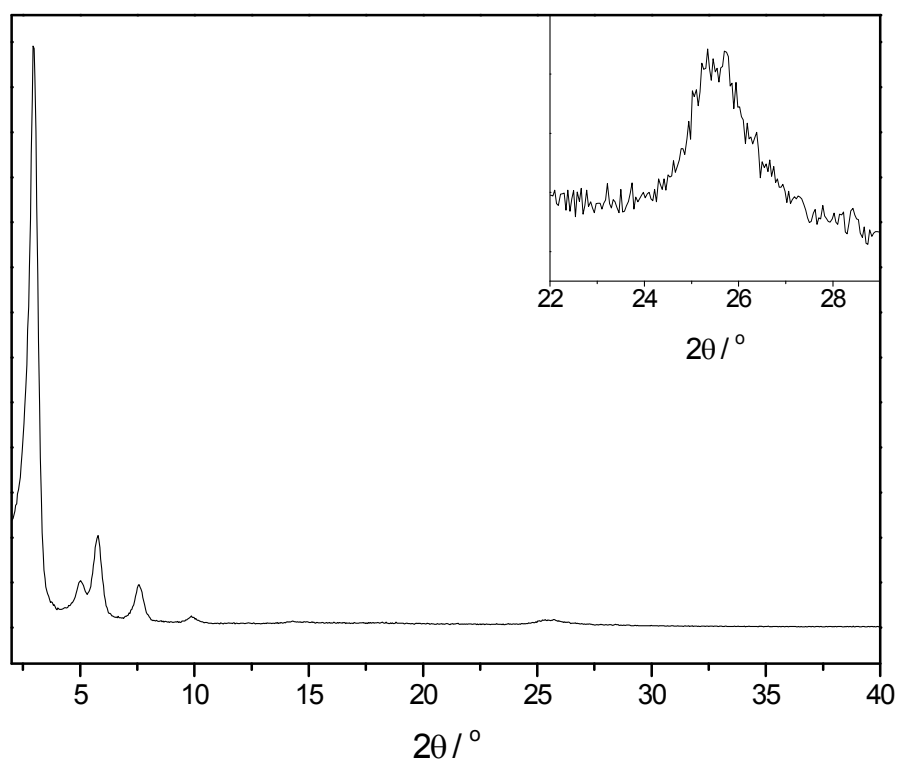

**Figure S2.** PXRD pattern of  $[\text{HC}\equiv\text{C}]_{0.5}\text{-TPB-DMTP-COF}$ .

**Table S1.** PXRD of [HC≡C]<sub>0.5</sub>-TPB-DMTP-COF.

| Pos.<br>(°2θ) | d-spacing<br>(Å) | Rel. Int.<br>(%) | FWHM<br>(°2θ) |
|---------------|------------------|------------------|---------------|
| 2.9750        | 29.698           | 100              | 0.3149        |
| 4.9836        | 17.732           | 7.81             | 0.3149        |
| 5.7930        | 15.256           | 15.63            | 0.3542        |
| 7.5515        | 11.707           | 7.27             | 0.3542        |
| 9.8914        | 8.942            | 1.64             | 0.1968        |
| 25.457        | 3.499            | 1.21             | 0.1447        |

• **Synthesis of [Uracil]<sub>0.5</sub>-TPB-DMTP-COF:**

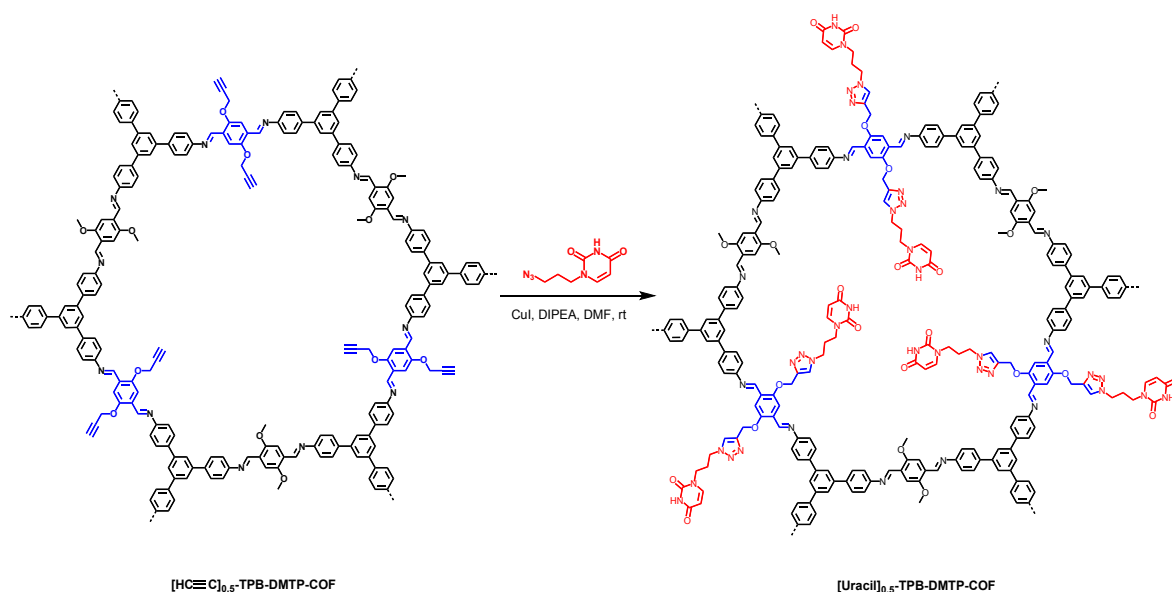

**Scheme S2.** Synthesis of [Uracil]<sub>0.5</sub>-TPB-DMTP-COF.

To 100.9 mg of [HC≡C]<sub>0.5</sub>-TPB-DMTP-COF in 2 mL of anhydrous DMF were added 24.3 mg (0.128 mmol) of CuI and 75  $\mu$ L of *N,N*-diisopropylethylamine (DIPEA). The suspension was purged with argon for 5 min and then 51 mg (0.261 mmol) of 1-(3-azidopropyl)uracil were added. The mixture was stirred overnight at room temperature under argon and centrifuged at 6000 rpm for 5 min. After washing with DMF, H<sub>2</sub>O, acetonitrile and THF the solid was dried under vacuum at 120 °C yielding an orange powder (151.8 mg, quantitative yield). FTIR (ATR) (cm<sup>-1</sup>): 3026, 2946, 1682, 1618, 1592, 1507, 1455, 1416, 1373, 1289, 1209, 1145, 1040, 829, 697.

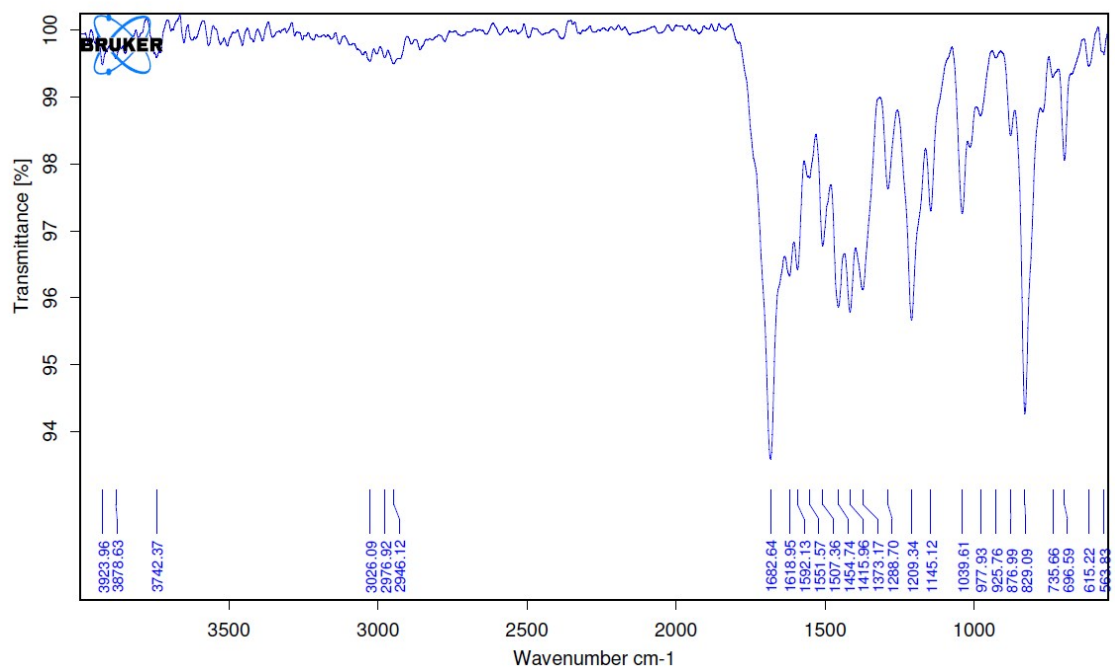

**Figure S3.** FTIR (ATR) spectrum of [Uracil]<sub>0.5</sub>-TPB-DMTP-COF.

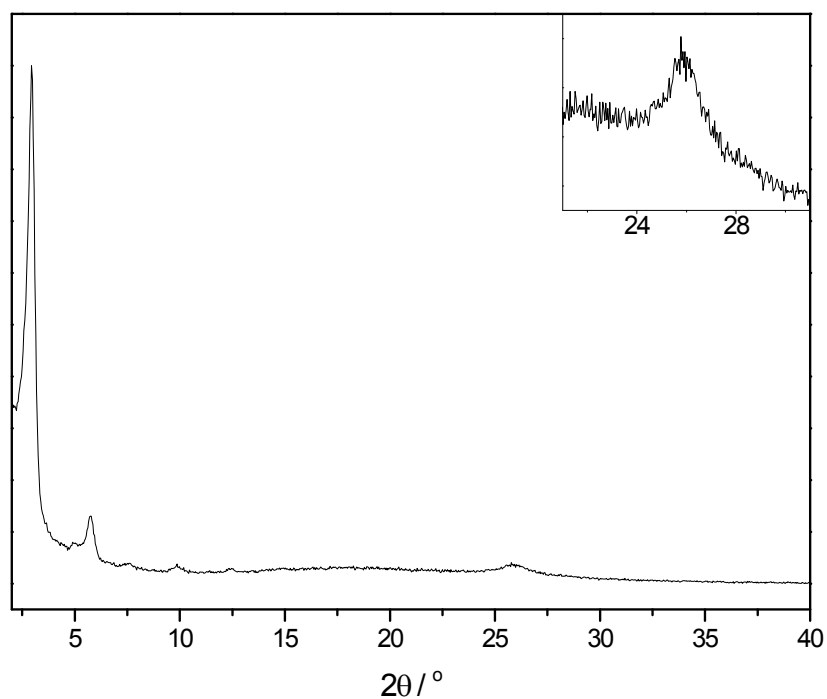

**Figure S4.** PXRD pattern of [Uracil]<sub>0.5</sub>-TPB-DMTP-COF.

**Table S2.** PXRD of [Uracil]<sub>0.5</sub>-TPB-DMTP-COF.

| Pos.<br>(°2 $\theta$ ) | d-spacing<br>(Å) | Rel. Int.<br>(%) | FWHM<br>(°2 $\theta$ ) |
|------------------------|------------------|------------------|------------------------|
| 2.9724                 | 29.724           | 100              | 0.2755                 |
| 4.9368                 | 17.900           | 7.85             | 0.1968                 |
| 5.7669                 | 15.325           | 13.24            | 0.2755                 |
| 7.6366                 | 11.577           | 3.84             | 0.3149                 |
| 9.8292                 | 8.999            | 3.37             | 0.1574                 |
| 25.5176                | 3.491            | 3.49             | 0.1574                 |

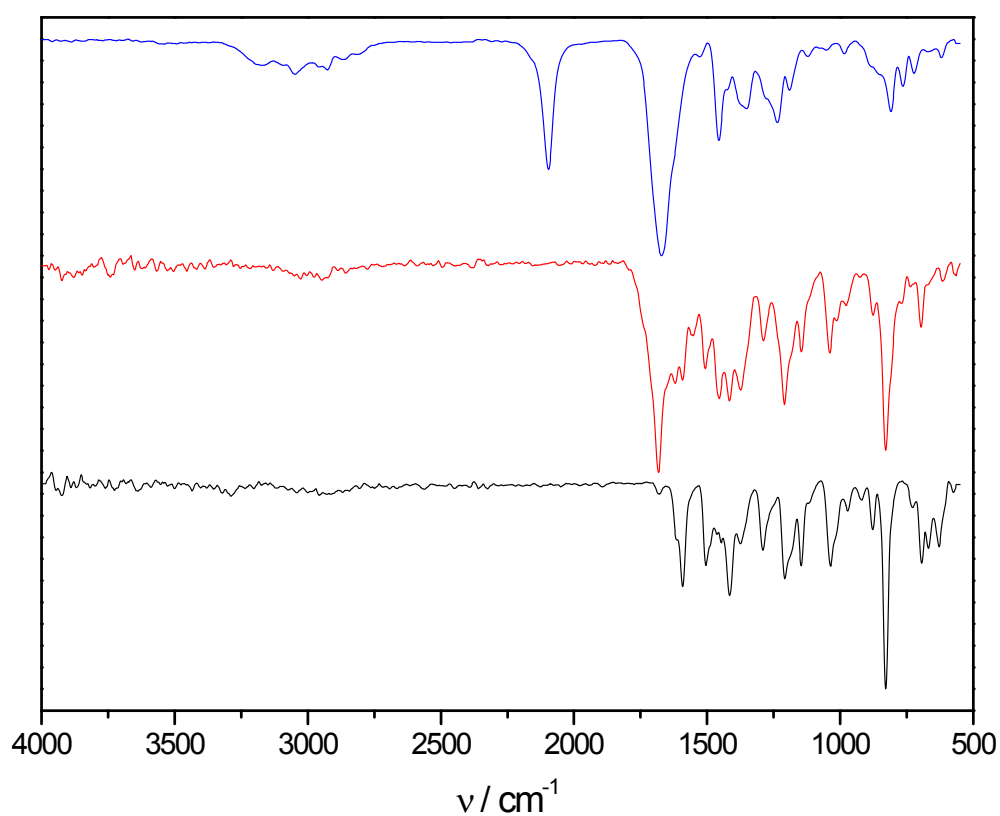

**Figure S5.** Comparative FTIR (ATR) spectra of [HC≡C]<sub>0.5</sub>-TPB-DMTP-COF (black), [Uracil]<sub>0.5</sub>-TPB-DMTP-COF (red), and 1-(3-azidopropyl)uracil (blue).



- Synthesis of TPB-DMTP-COF:<sup>1</sup>

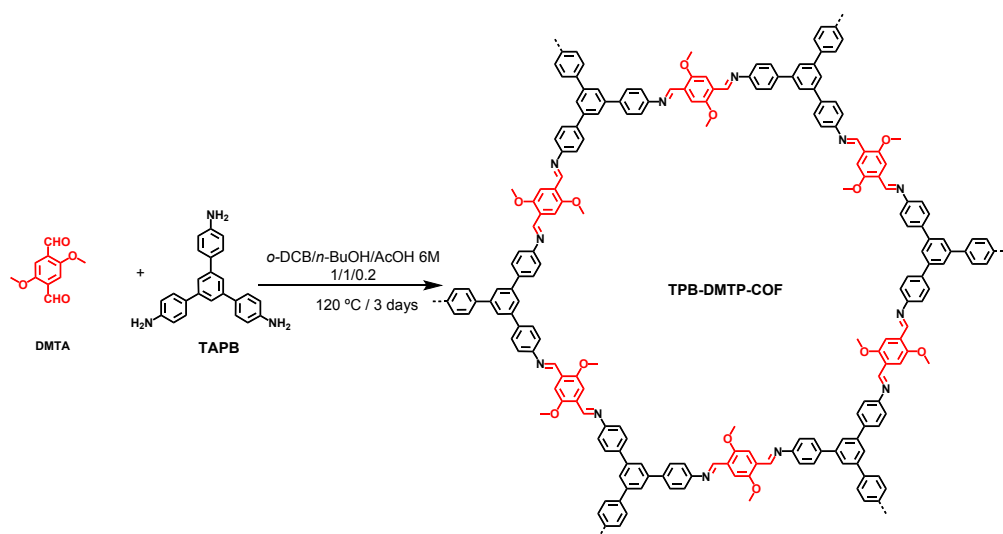

**Scheme S3.** Synthesis of TPB-DMTP-COF.

**DMTA** (84.4 mg, 0.435 mmol), **TAPB** (102.5 mg, 0.292 mmol) and *o*-DCB/*n*-Butanol (2 mL/2 mL) and acetic acid (6 M, 0.4 mL) in a Pyrex vessel ( $\phi$  = 18 mm, h = 10 cm) were obtained, after Soxhlet extraction in THF, 162.1 mg (95 %) of a yellow solid. FTIR (ATR) ( $\text{cm}^{-1}$ ): 2957, 1592, 1504, 1464, 1410, 1290, 1211, 1144, 1042, 879, 823, 639.

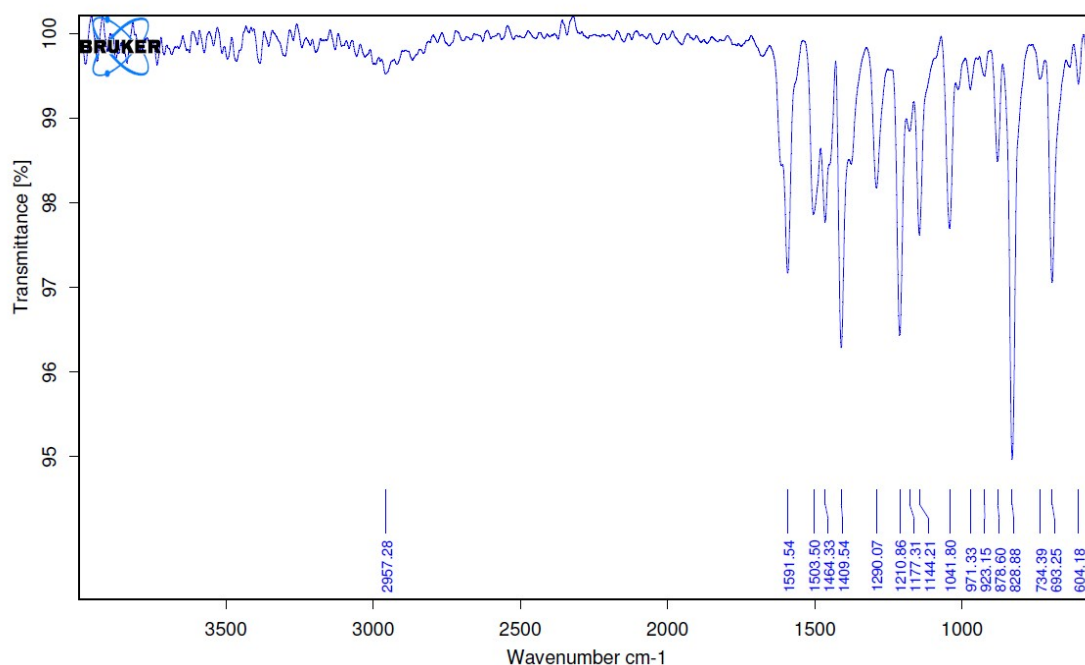

**Figure S6.** FTIR (ATR) spectrum of TPB-DMTP-COF.

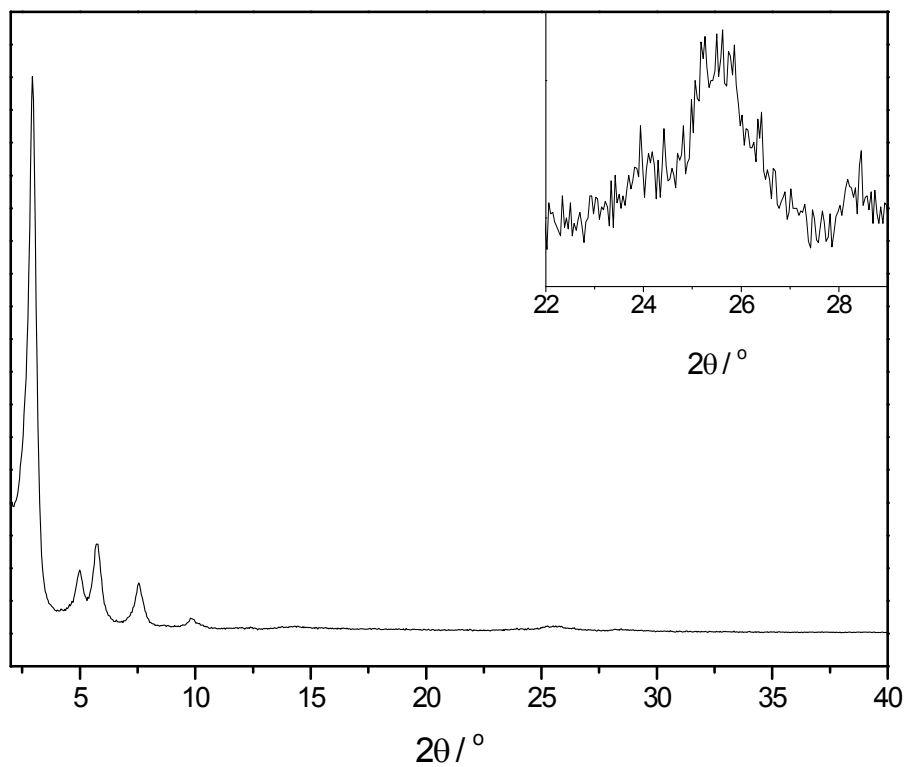

**Figure S7.** PXRD pattern of **TPB-DMTP-COF**.

**Table S3.** PXRD of **TPB-DMTP-COF**.

| <b>Pos.</b><br><b>(°2θ)</b> | <b>d-spacing</b><br><b>(Å)</b> | <b>Rel. Int.</b><br><b>(%)</b> | <b>FWHM</b><br><b>(°2θ)</b> |
|-----------------------------|--------------------------------|--------------------------------|-----------------------------|
| <b>2.9531</b>               | 29.919                         | 100                            | 0.2362                      |
| <b>4.9972</b>               | 17.684                         | 11.25                          | 0.2755                      |
| <b>5.7309</b>               | 15.422                         | 15.95                          | 0.3149                      |
| <b>7.5433</b>               | 11.720                         | 8.92                           | 0.2755                      |
| <b>9.8263</b>               | 9.001                          | 2.51                           | 0.1968                      |
| <b>25.5271</b>              | 3.499                          | 1.03                           | 0.1378                      |

- **Synthesis of TPB-DMTP-COF-TAZ:**<sup>4</sup>

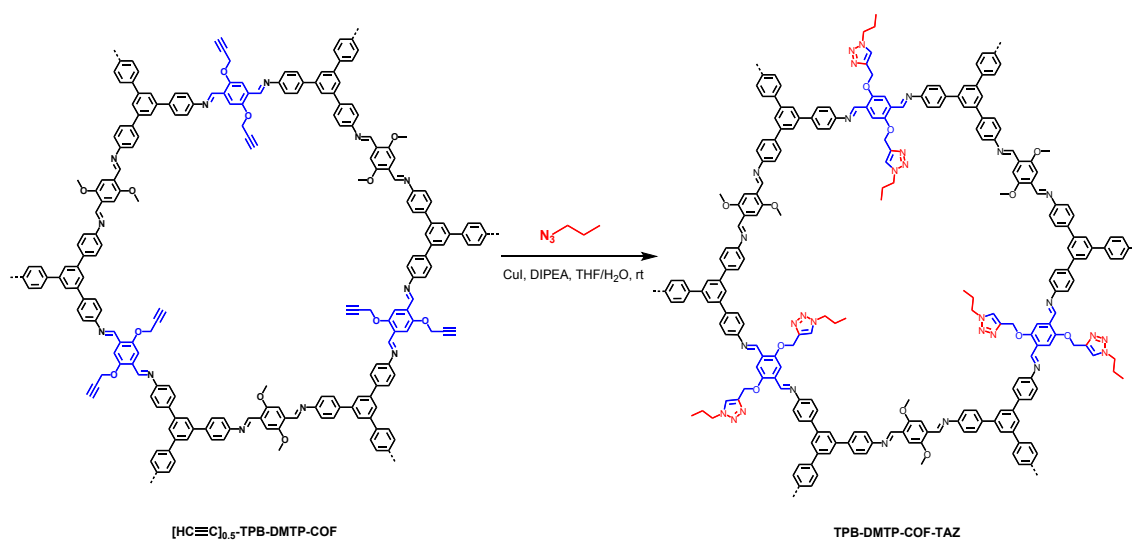

**Scheme S4.** Synthesis of **TPB-DMTP-COF-TAZ**.

34.4 mg (0.18 mmol) of CuI and 129.2 mg of  $[\text{HC}\equiv\text{C}]_{0.5}\text{-TPB-DMTP-COF}$  were suspended in a mixture of THF/ $\text{H}_2\text{O}$  (3.9/1.7 mL). The suspension was purged with Argon for 5 min and then *N,N*-diisopropylethylamine (DIPEA) was added (92.7  $\mu\text{L}$ ). The mixture was purged with Argon for 5 min and toluene (0.2 mL) and 60 mg of 1-azidopropane<sup>3</sup> were added. The suspension was stirred overnight at room temperature under argon. The solid was centrifuged with 5 mL of THF. Then, it was washed thoroughly with water, THF and dried, yielding a yellow solid (166 mg). FTIR (ATR) ( $\text{cm}^{-1}$ ): 2965, 2971, 1769, 1591, 1503, 1463, 1414, 1380, 1290, 1146, 1042, 877, 829, 733, 696, 607.

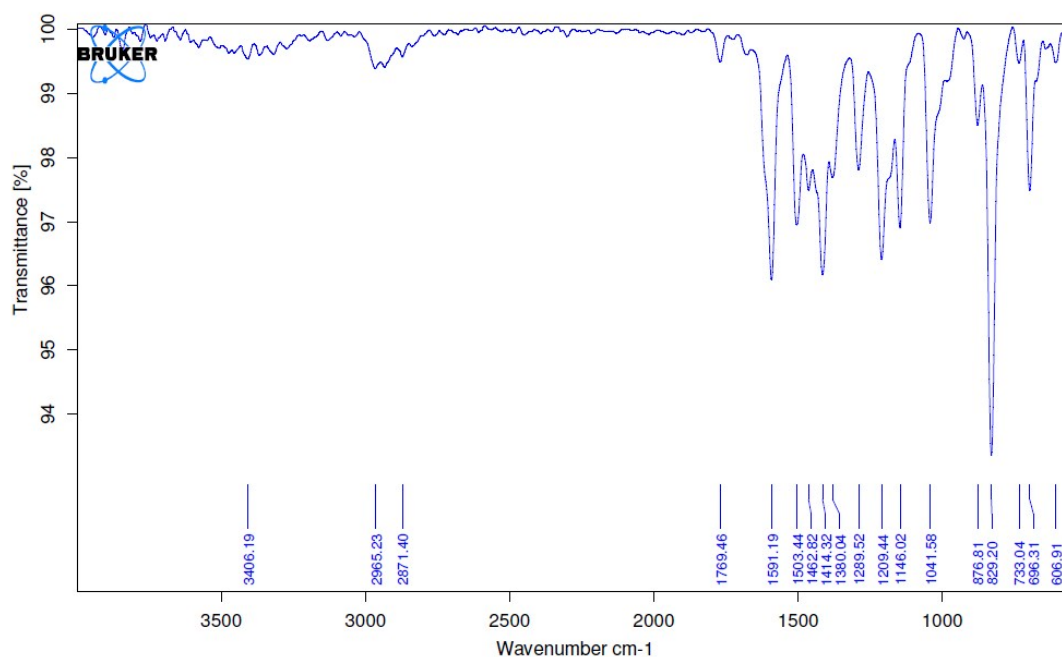

**Figure S8.** FTIR (ATR) spectrum of TPB-DMTP-COF-TAZ.

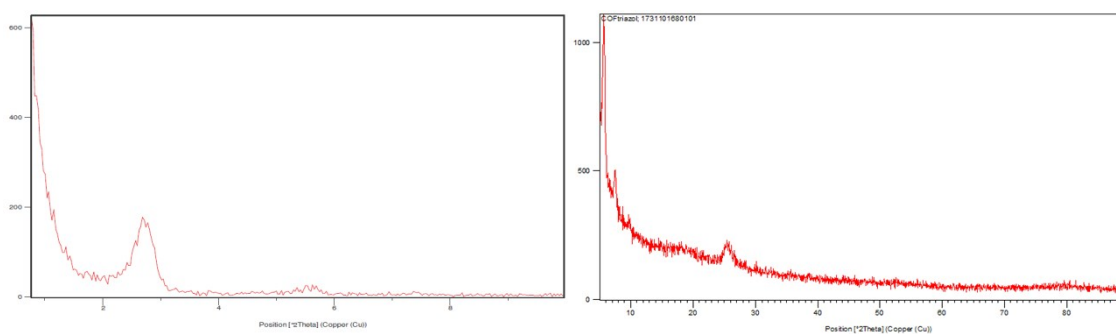

**Figure S9.** PXRD patterns of TPB-DMTP-COF-TAZ.

**Table S4.** PXRD of TPB-DMTP-COF-TAZ.

| Small-angle range |                  |                  | Wide-angle range |                  |                  |
|-------------------|------------------|------------------|------------------|------------------|------------------|
| Pos.<br>(°2θ)     | d-spacing<br>(Å) | Rel. Int.<br>(%) | Pos.<br>(°2θ)    | d-spacing<br>(Å) | Rel. Int.<br>(%) |
| 2.7299            | 32.338           | 100              | 5.6783           | 15.564           | 100              |
| 5.6243            | 15.714           | 9.23             | 7.4671           | 11.829           | 45.80            |
|                   |                  |                  | 25.4213          | 3.504            | 18.83            |

**Table S5.** Lattice parameters of the synthesized COFs.

|                                            | <b>a=b / Å</b> | <b>c / Å</b> | <b><math>\alpha=\beta</math> / °</b> | <b><math>\gamma</math> / °</b> |
|--------------------------------------------|----------------|--------------|--------------------------------------|--------------------------------|
| <b>[HC≡C]<sub>0.5</sub>-TPB-DMTP-COF</b>   | 35.3           | 3.50         | 90                                   | 120                            |
| <b>[Uracil]<sub>0.5</sub>-TPB-DMTP-COF</b> | 35.3           | 3.49         | 90                                   | 120                            |
| <b>TPB-DMTP-COF</b>                        | 35.4           | 3.49         | 90                                   | 120                            |
| <b>TPB-DMTP-COF-TAZ</b>                    | 36.6           | 3.50         | 90                                   | 120                            |

- **Nitrogen adsorption isotherms data**

**Table S6.** Surface area, pore volume and pore size of COFs.

|                                                      | <b>BET surface area<br/>(m<sup>2</sup> g<sup>-1</sup>)</b> | <b>Pore volume<br/>(cm<sup>3</sup> g<sup>-1</sup>)</b> | <b>Pore size<br/>(nm)</b> |
|------------------------------------------------------|------------------------------------------------------------|--------------------------------------------------------|---------------------------|
| <b>[HC≡C]<sub>0.5</sub>-TPB-DMTP-COF (ref 1)</b>     | 1642                                                       | 1.02                                                   | 3.03                      |
| <b>[HC≡C]<sub>0.5</sub>-TPB-DMTP-COF (this work)</b> | 1510                                                       | 0.94                                                   | 2.53                      |
| <b>[Uracil]<sub>0.5</sub>-TPB-DMTP-COF</b>           | 105                                                        | 0.088                                                  | 1.30                      |

## TGA of COFs

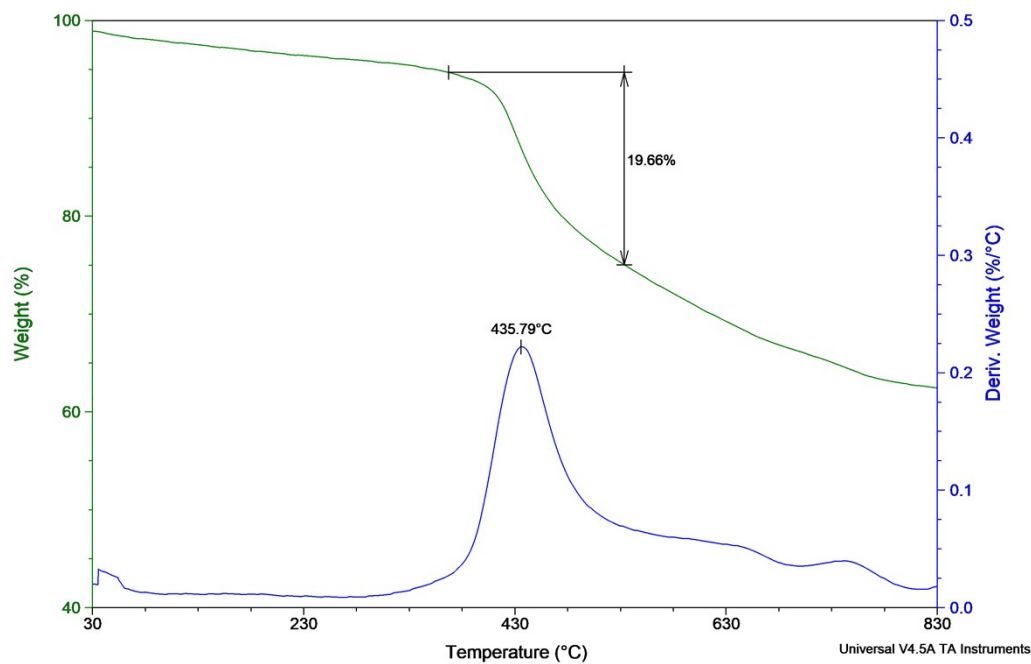

Figure S10. TGA profile of [HC≡C]<sub>0.5</sub>-TPB-DMTP-COF. Heating ramp: 10 °C/min.

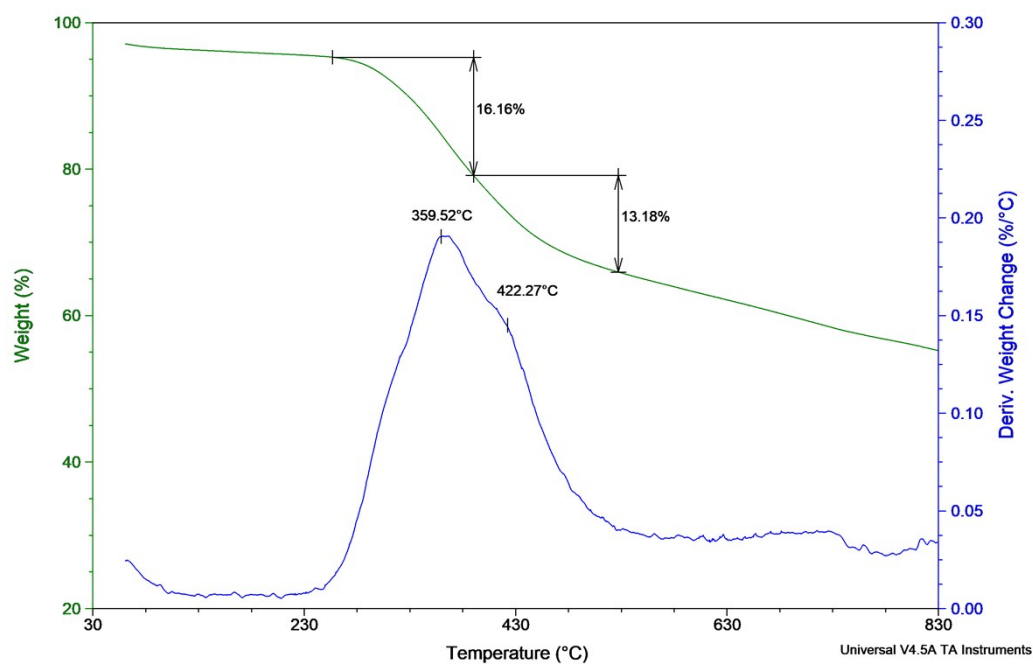

Figure S11. TGA profile of [Uracil]<sub>0.5</sub>-TPB-DMTP-COF. Heating ramp: 10 °C/min.

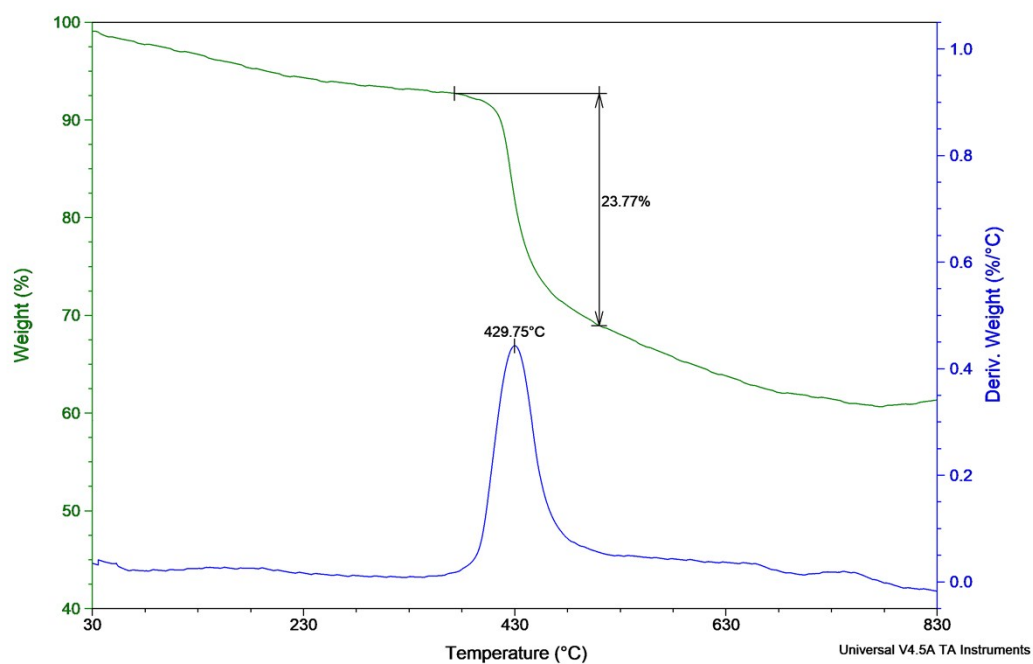

Figure S12. TGA profile of TPB-DMTP-COF. Heating ramp: 10 °C/min.

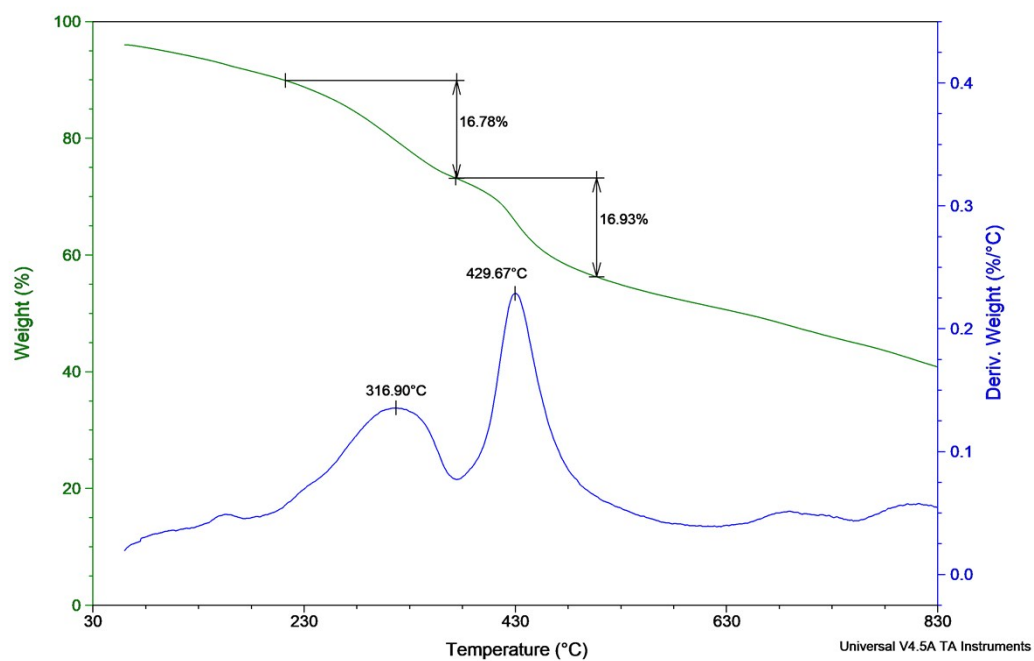

Figure S13. TGA profile of TPB-DMTP-COF-TAZ. Heating ramp: 10 °C/min.

-  $^1\text{H}$  NMR,  $^{13}\text{C}$  NMR and FTIR spectra of starting materials and COFs

$^1\text{H}$  NMR 1-(3-azidoprop-1-yl)-Uracil

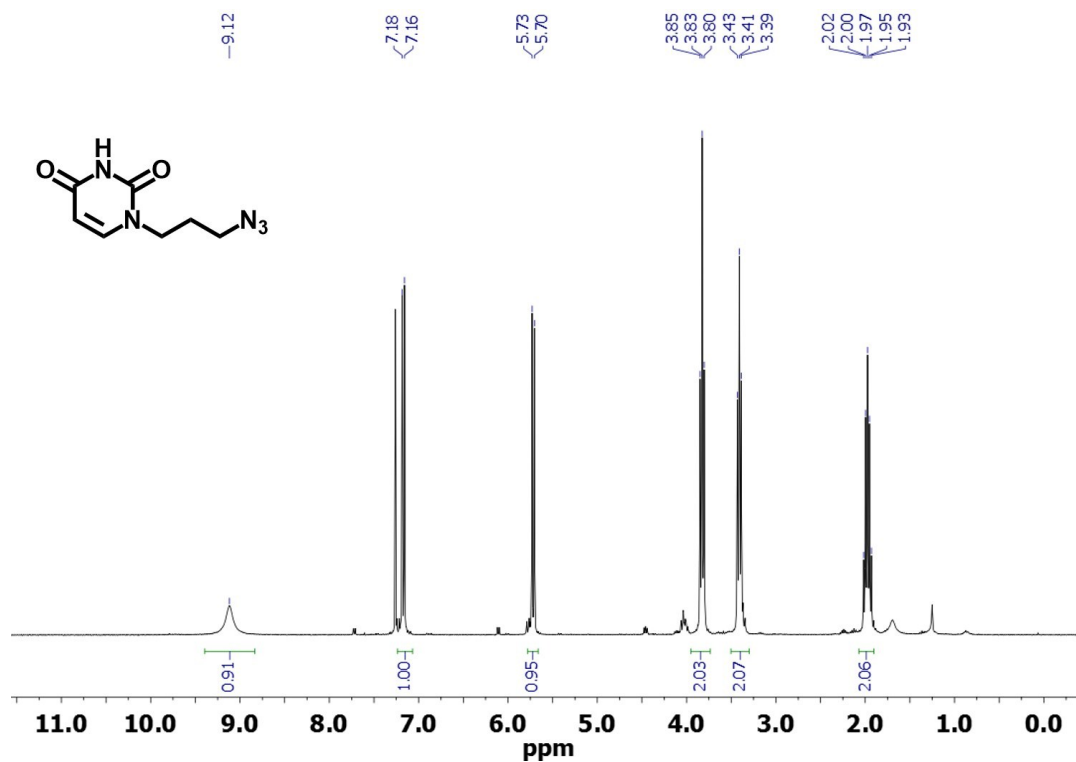

$^{13}\text{C}$  NMR 1-(3-azidoprop-1-yl)-Uracil

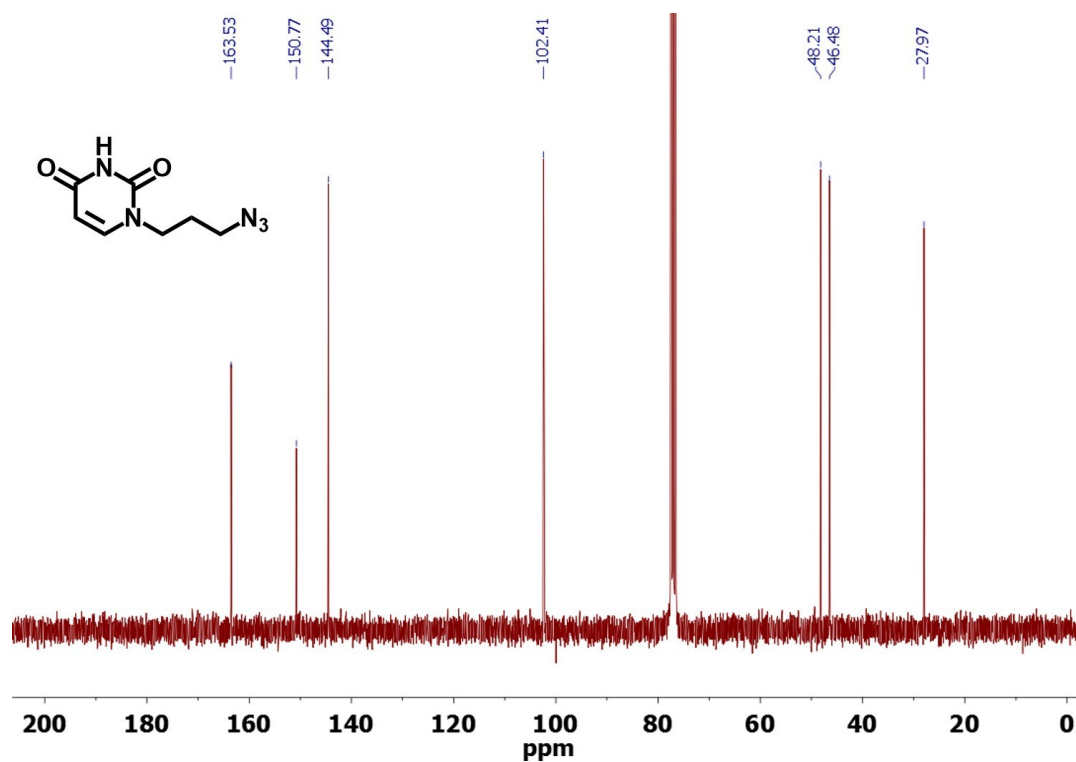



FTIR 1-(3-azidoprop-1-yl)-Uracil

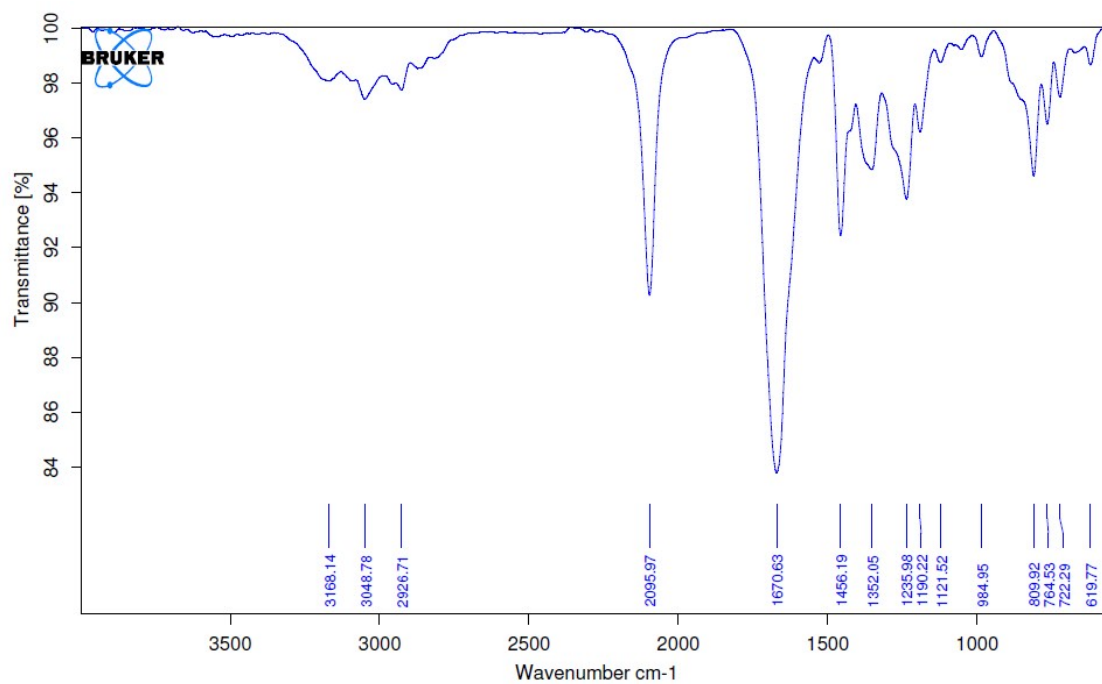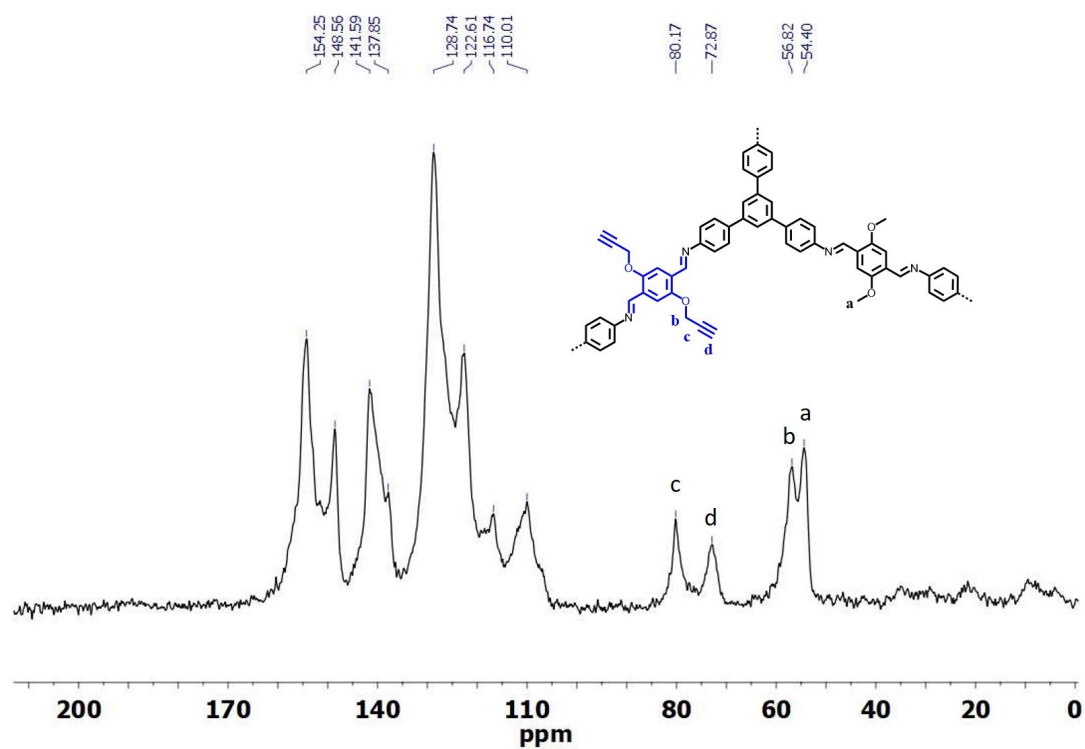

Figure S14. CP/MAS-<sup>13</sup>C NMR of [HC≡C]<sub>0.5</sub>-TPB-DMTP-COF.

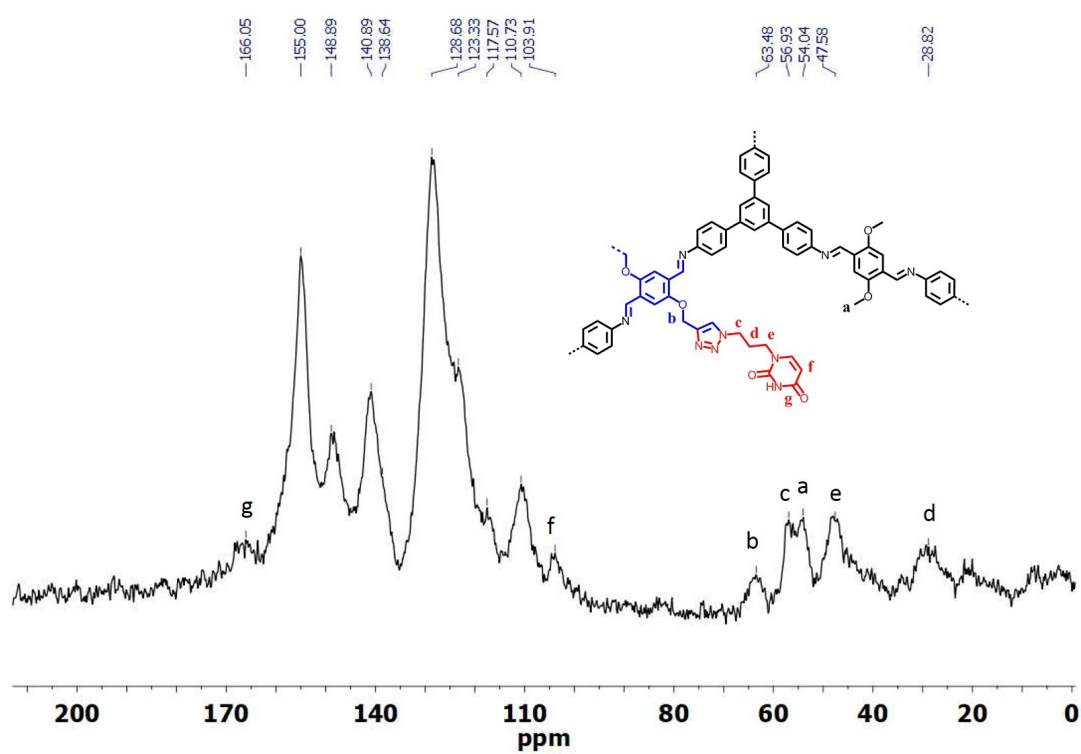

Figure S15. CP/MAS-<sup>13</sup>C NMR of [Uracil]<sub>0.5</sub>-TPB-DMTP-COF.

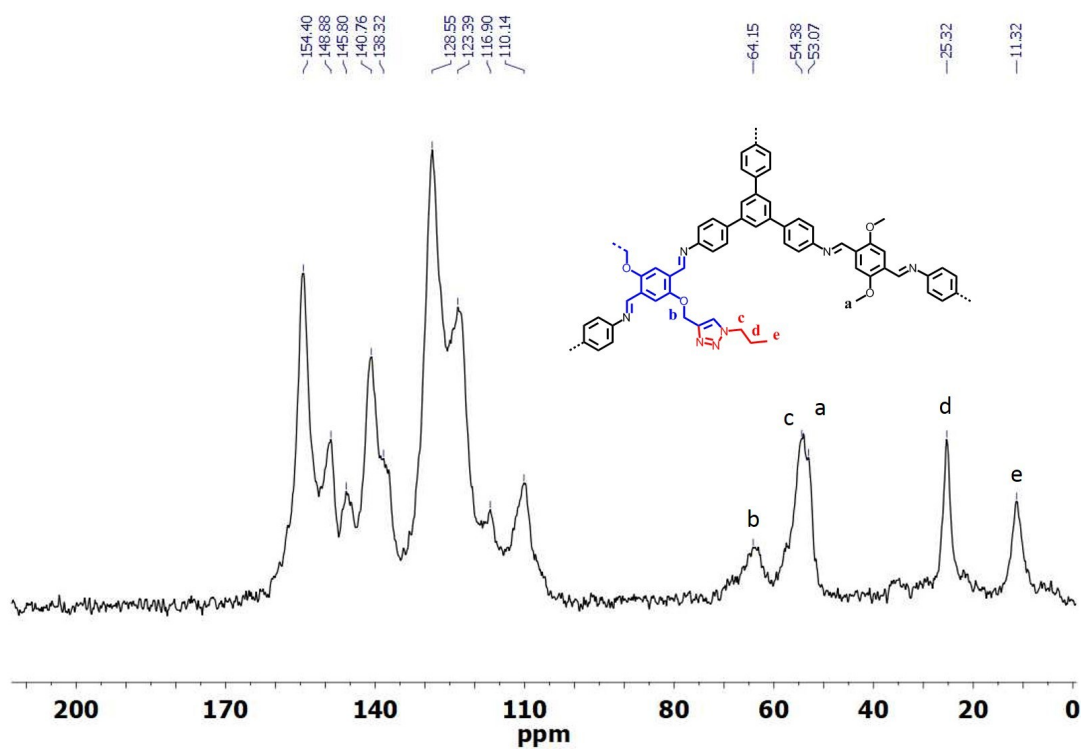

Figure S16. CP/MAS-<sup>13</sup>C NMR of TPB-DMTP-COF-TAZ.

- **Elemental Analysis**

- **[HC≡C]<sub>0.5</sub>-TPB-DMTP-COF**

Calculated - C: 80.75 %, H: 4.84 %, N: 6.73 %

Experimental - C: 78.73 %, H: 5.06 %, N: 6.46 %

Experimental - C: 79.20 %, H: 4.99 %, N: 6.48 %

Experimental - C: 79.04 %, H: 5.05 %, N: 6.47 %

- **[Uracil]<sub>0.5</sub>-TPB-DMTP-COF**

Calculated – C: 68.73 %, H: 4.78 %, N: 16.03 %

Experimental – C: 60,91 %, H: 4,72 %, N: 13,71 %

Experimental – C: 61,50 %, H: 4,80 %, N: 14,00 %

Experimental – C: 61,39 %, H: 4,76 %, N: 13,78 %

- **TPB-DMTP-COF**

Calculated - C: 79.57 %, H: 5.14 %, N: 7.14 %

Experimental - C: 78.38 %, H: 5.67 %, N: 6.06 %

Experimental - C: 75.56 %, H: 5.43 %, N: 5.83 %

Experimental - C: 78.36 %, H: 5.69 %, N: 6.12 %

- **TPB-DMTP-COF-TAZ**

Calculated - C: 73.60 %, H: 5.56 %, N: 14.31 %

Experimental - C: 64.14 %, H: 4.99 %, N: 10.24 %

Experimental - C: 64.58 %, H: 5.00 %, N: 10.27 %

Experimental - C: 64.10 %, H: 4.91 %, N: 10.13 %

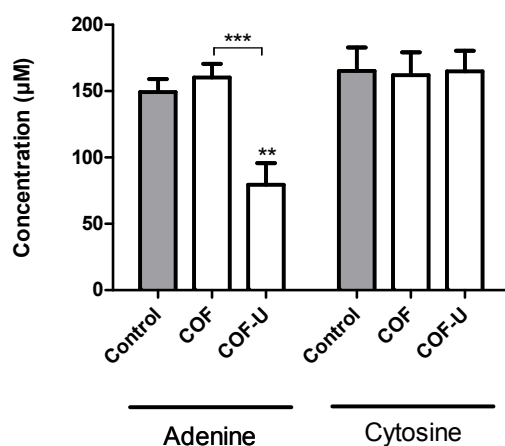

**Fig S17.** Concentration of nucleobases (adenine & cytosine) after incubation for 18 h with TPB-DMTP-COF-TAZ (COF-P) and [Uracil]<sub>0.5</sub>-TPB-DMTP-COF (COF-U) in methanol. All the experiments were done in triplicates. Statistical analysis was performed using one-way ANOVA Tukey's test (each group vs Control). \*P<0.01, \*\*P<0.001, and \*\*\*P<0.0001.

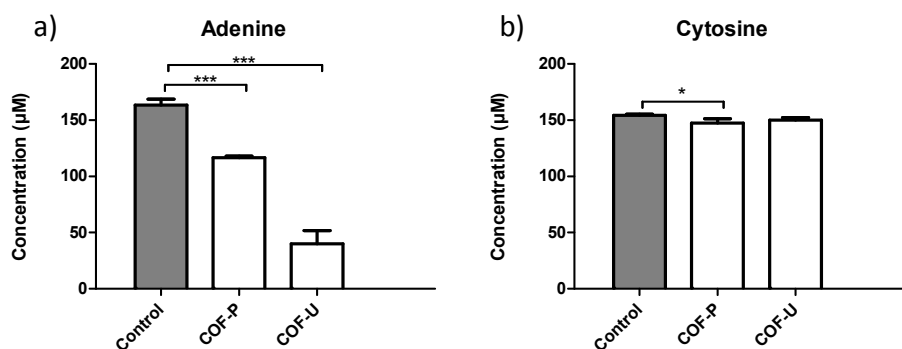

**Figure S18.** Concentration of nucleobases in the media after incubation at 150 μM using TPB-DMTP-COF-TAZ (COF-P) and [Uracil]<sub>0.5</sub>-TPB-DMTP-COF (COF-U) for 22 hours. (a) Adenine, (b) Cytosine. The interaction of adenine with [Uracil]<sub>0.5</sub>-TPB-DMTP-COF is superior compared with any other combination. All the experiments were done in triplicates. Statistical analysis was performed using one-way ANOVA Tukey's test (each group vs Control). \*P<0.01, \*\*P<0.001, and \*\*\*P<0.0001.

## - References

1. H. Xu, J. Gao and D. Jiang, *Nat. Chem.*, 2015, **7**, 905.
2. A. de la Peña Ruigómez, D. Rodríguez-San-Miguel, K. C. Stylianou, M. Cavallini, D. Gentili, F. Liscio, S. Milita, O. M. Roscioni, M. L. Ruiz-González, C. Carbonell, D. MasPOCH, R. Mas-Ballesté, J. L. Segura and F. Zamora, *Chem. Eur. J.*, 2015, **21**, 10666-10670.
3. S. Balabadra, M. Kotni, V. Manga, A. D. Allanki, R. Prasad and P. S. Sijwali, *Bioorg. Med. Chem.*, 2017, **25**, 221-232.

4. L. Meri-Bofi, S. Royuela, F. Zamora, M. L. Ruiz-Gonzalez, J. L. Segura, R. Munoz-Olivas and M. J. Mancheno, *J. Mater. Chem. A*, 2017, **5**, 17973-17981.
